## Contribution of *KRAS* mutations and c.2369C > T (p.T790M) *EGFR* to acquired resistance to EGFR-TKIs in *EGFR* mutant NSCLC: a study on circulating tumor DNA

Marzia Del Re<sup>1</sup>, Marcello Tiseo<sup>2</sup>, Paola Bordi<sup>2</sup>, Armida D’Incecco<sup>3</sup>, Andrea Camerini<sup>4</sup>, Iacopo Petrini<sup>5</sup>, Maurizio Lucchesi<sup>6</sup>, Alessandro Inno<sup>7</sup>, Daniele Spada<sup>8</sup>, Enrico Vasile<sup>6</sup>, Valentina Citi<sup>1</sup>, Giorgio Malpeli<sup>9</sup>, Enrica Testa<sup>8</sup>, Stefania Gori<sup>7</sup>, Alfredo Falcone<sup>6</sup>, Domenico Amoroso<sup>4</sup>, Antonio Chella<sup>10</sup>, Federico Cappuzzo<sup>3</sup>, Andrea Ardizzoni<sup>2</sup>, Aldo Scarpa<sup>9</sup>, Romano Danesi<sup>1</sup>

<sup>1</sup>Department of Clinical and Experimental Medicine, University of Pisa, Pisa, Italy

<sup>2</sup>Medical Oncology Unit, Azienda Ospedaliero-Universitaria, Parma, Italy

<sup>3</sup>Medical Oncology Unit, AUSL6, Istituto Toscano Tumori, Livorno, Italy

<sup>4</sup>Medical Oncology Unit, AUSL12, Istituto Toscano Tumori, Lido di Camaiore, Italy

<sup>5</sup>Department of Translational Research and New Technologies in Medicine and Surgery, University of Pisa, Pisa, Italy

<sup>6</sup>Medical Oncology Unit 2, Azienda Ospedaliero-Universitaria, Pisa, Italy

<sup>7</sup>Medical Oncology Unit, Ospedale Sacro Cuore, Negrar, Italy

<sup>8</sup>Medical Oncology Unit, Ospedale Santa Maria della Misericordia, Urbino, Italy

<sup>9</sup>ARC-NET Research Centre and Department of Pathology and Diagnostics, Azienda Ospedaliero-Universitaria, Verona, Italy

<sup>10</sup>Lung Diseases Unit, Azienda Ospedaliero-Universitaria, Pisa, Italy

**Correspondence to:** Romano Danesi, **email:** romano.danesi@unipi.it

**Keywords:** cell-free circulating tumor DNA, *KRAS*, *EGFR*, activating mutation, tyrosine kinase inhibitors

**Received:** June 24, 2015

**Accepted:** December 29, 2015

**Published:** January 20, 2016

### ABSTRACT

**Introduction:** *KRAS* oncogene mutations (<sup>MUT</sup>*KRAS*) drive resistance to EGFR inhibition by providing alternative signaling as demonstrated in colo-rectal cancer. In non-small cell lung cancer (NSCLC), the efficacy of treatment with EGFR tyrosine kinase inhibitors (EGFR-TKIs) depends on activating *EGFR* mutations (<sup>MUT</sup>*EGFR*). However, inhibition of *EGFR* may select resistant cells displaying alternative signaling, i.e., *KRAS*, or restoration of EGFR activity due to additional <sup>MUT</sup>*EGFR*, i.e., the c.2369C > T (p.T790M *EGFR*).

**Aim:** The aim of this study was to investigate the appearance of <sup>MUT</sup>*KRAS* during EGFR-TKI treatment and their contribution to drug resistance.

**Methods:** This study used cell-free circulating tumor DNA (cftDNA) to evaluate the appearance of codon 12 <sup>MUT</sup>*KRAS* and p.T790M *EGFR* mutations in 33 advanced NSCLC patients progressing after an EGFR-TKI.

**Results:** p.T790M *EGFR* was detected in 11 (33.3%) patients, <sup>MUT</sup>*KRAS* at codon 12 in 3 (9.1%) while both p.T790M *EGFR* and <sup>MUT</sup>*KRAS* codon 12 were found in 13 (39.4%) patients. Six patients (18.2%) were *KRAS* wild-type (<sup>WT</sup>*KRAS*) and negative for p.T790M *EGFR*. In 8 subjects paired tumor re-biopsy/plasma samples were available; the percent concordance of tissue/plasma was 62.5% for p.T790M *EGFR* and 37.5% for <sup>MUT</sup>*KRAS*. The analysis of time to progression (TTP) and overall survival (OS) in <sup>WT</sup>*KRAS* vs. <sup>MUT</sup>*KRAS* were not statistically different, even if there was a better survival with <sup>WT</sup>*KRAS* vs. <sup>MUT</sup>*KRAS*, i.e., TTP 14.4 vs. 11.4 months ( $p = 0.97$ ) and OS 40.2 vs. 35.0 months ( $p = 0.56$ ), respectively.

**Conclusions: <sup>MUT</sup>KRAS could be an additional mechanism of escape from EGFR-TKI inhibition and cftDNA is a feasible approach to monitor the molecular development of drug resistance.**

## INTRODUCTION

Activating mutations of epidermal growth factor receptor (<sup>MUT</sup>EGFR) predict sensitivity to tyrosine kinase inhibitors (TKI) in non-small cell lung cancer (NSCLC). Despite a very high response rate (about 70%) to first-line treatment with the EGFR-TKIs (erlotinib, gefitinib or afatinib) in <sup>MUT</sup>EGFR NSCLC, tumors invariably progress after a median of 9–13 months from the beginning of treatment [1–3].

The understanding of the molecular basis of acquired resistance to TKI [4] and its application to treatment monitoring may improve treatment management by discontinuing ineffective treatments and directing towards most appropriate second line options before clinical progression may occur. Indeed, EGFR signaling is maintained in most cases that develop secondary resistance [5] suggesting that additional molecular mechanisms can bypass EGFR-TKI inhibition reactivating the signaling pathway. Several mechanisms of acquired resistance to EGFR-TKI have been described after progression, including c.2369C > T (p.T790M) EGFR gatekeeper mutation (p.T790M EGFR, ~50% of patients) [6], MET (5–15%) [7] or HER2 (12%) [8] amplifications, PIK3CA (4.1%) [9] or BRAF (1%) [10] mutations or transformation into small cell histology (3%) [11].

NSCLC heterogeneity can drive the therapeutic decisions [12]; therefore, tissue availability is increasingly recognized as a crucial issue. Unfortunately, the location of the tumor and the risk of complications are serious limitations to re-biopsies in NSCLC [13]. Alternatively, the detection of somatic mutations in cell-free tumor DNA (cftDNA) released in plasma could be instrumental for a better understanding of the genetic modifications driven by the selective pressure of drug treatments [14].

Interestingly, approximately 15–25% of patients with NSCLC have KRAS mutations (<sup>MUT</sup>KRAS), resulting in constitutive activation of KRAS signaling pathways. <sup>MUT</sup>KRAS is a negative predictor of benefit to anti-EGFR antibodies in colo-rectal cancer, while it seems to be a negative predictor of response to EGFR-TKIs in EGFR wild type (<sup>WT</sup>EGFR) NSCLC patients [15]. In a previous study on a large collection of NSCLC tissues from patients with acquired resistance to EGFR-TKI, NRAS or KRAS mutations were not demonstrated [10]. Despite these negative results, we employed a sensitive ddPCR-based platform to investigate the presence of <sup>MUT</sup>KRAS alleles in plasma of patients resistant to EGFR-TKIs and we were able to demonstrate a potential role of <sup>MUT</sup>KRAS in acquired resistance to EGFR-TKI, besides the p.T790M EGFR.

This finding reveals a potential new mechanism of resistance to EGFR-TKI and underscores the need of a periodic monitoring of somatic mutations of known oncogenes to deliver the best personalized treatment in a timely fashion.

## RESULTS

The clinical characteristics of patients are reported in Table 1. Of 33 patients, 20 (60.6%) were female and 13 (39.4%) male. Median age was 62 years (range 41 – 75); 32 patients were affected by a stage IV disease, while one was a stage IIIB NSCLC. The frequency of activating <sup>MUT</sup>EGFR was as follows: 20 patients (60.6%) showed ex19del EGFR, 10 patients (30.3%) p.L858R EGFR, 2 patients (6.1%) p.L747P EGFR and 1 patient presented ex19ins EGFR (3%). As expected, the majority of them (66.7%) was never-smokers, while 9 (27.2%) and 2 (6.1%) patients were former- and current-smokers, respectively. Twenty-seven (81.8%) subjects received gefitinib and 6 (18.2%) erlotinib; the treatment was administered as first-line in 23 (69.7%) (including 2 as maintenance), second-line in 6 (18.2%) and third or further lines in 4 patients (12.1%). The majority of them (66.7%) presented partial response to TKI treatment and only 1 patient showed complete response (Table 1). Stable and progressive diseases were observed in 4 (12.1%) and 6 subjects (18.2%), respectively. Patients who have progressed on EGFR-TKI treatment, all receiving gefitinib, presented the following molecular profile in their primary tumors: p.L747P EGFR and ex19del EGFR (n = 1 each) and p.L858R EGFR (n = 4). Median time to progression (TTP) was 13.6 months (95% Confidence Interval, CI, range 8.0 – 19.2 months) and median overall survival (OS) was 40.2 months (95% CI range 25.8–54.7 months) for the overall population.

The description of patients with activating <sup>MUT</sup>EGFR in their primary tumors as well as the percentages of p.T790M EGFR and <sup>MUT</sup>KRAS alleles in cftDNA at the time of EGFR-TKI progression is reported in Table 2. In 16 patients (48.5%), a codon 12 <sup>MUT</sup>KRAS was detected in cftDNA (Figure 1). In addition to this, the p.T790M EGFR (c.2369C > T) second site mutation was present in the cftDNA of 24 patients (72.7%). Interestingly, 13 patients (39.4%) had both the <sup>MUT</sup>KRAS and p.T790M EGFR, while 3 (9.1%) and 11 (33.3%) subjects displayed only <sup>MUT</sup>KRAS or p.T790M EGFR, respectively (Figure 1). Six subjects displayed no mutations.

The association between smoking habit and the occurrence of <sup>MUT</sup>KRAS in cftDNA was investigated. Regarding the 11 patients with smoking history, 2 (18.2%)

**Table 1: Characteristics of patients**

|                          |                | No. (%)            |
|--------------------------|----------------|--------------------|
| Age years (range)        |                | 62 (41 – 75)       |
| Gender                   | male           | 13 (39.4%)         |
|                          | female         | 20 (60.6%)         |
| Smoking habit            | smokers        | 2 (6.1%)           |
|                          | never-smokers  | 22 (66.7%)         |
|                          | former-smokers | 9 (27.2%)          |
| Stage                    | IIIB           | 1 (3%)             |
|                          | IV             | 32 (97%)           |
| EGFR activating mutation | ex19del        | 20 (60.6%)         |
|                          | p.L858R        | 10 (30.3%)         |
|                          | p.L747P        | 2 (6.1%)           |
|                          | ex19ins        | 1 (3%)             |
| Line of treatment        | 1              | 23 (69.7%)         |
|                          | 2              | 6 (18.2%)          |
|                          | ≥ 3            | 4 (12.1%)          |
| TKI                      | gefitinib      | 27 (81.8%)         |
|                          | erlotinib      | 6 (18.2%)          |
| Response                 | CR             | 1 (3%)             |
|                          | PR             | 22 (66.7%)         |
|                          | SD             | 4 (12.1%)          |
|                          | PD             | 6 (18.2%)          |
| TTP months (95% CI)      |                | 13.6 (8.0 – 19.2)  |
| OS months (95% CI)       |                | 40.2 (25.8 – 54.7) |

Abbreviations: TKI: tyrosine kinase inhibitor; TTP: time to progression; OS: overall survival

presented <sup>MUT</sup>*KRAS* and 9 (81.8%) were wild-type (<sup>WT</sup>*KRAS*). On the contrary, of 22 non-smoking subjects, 14 (63.3%) were <sup>MUT</sup>*KRAS* and 8 (36.4%) <sup>WT</sup>*KRAS*. Fisher's exact test revealed that non-smoking habit and <sup>MUT</sup>*KRAS* were significantly associated ( $p = 0.026$ ).

In 8 patients, paired re-biopsies and cftDNA were available. The 8 re-biopsies were performed in a different tumor site with respect to the initial diagnosis, the choice being dependent on several factors, i.e., anatomical accessibility, new or progressing lesions. The analysis of re-biopsies by standard methods and ddPCR demonstrated <sup>p.T790M</sup>*EGFR* in 4 (standard) vs. 2 (ddPCR) samples and <sup>MUT</sup>*KRAS* in none (standard) vs. 3 (ddPCR) specimens. <sup>p.T790M</sup>*EGFR* and <sup>MUT</sup>*KRAS* were detected in 7 and 5 cftDNA specimens, respectively.

The analysis of *KRAS* status by ddPCR in the biopsies at diagnosis revealed the presence of <sup>MUT</sup>*KRAS* in 2 patients, who were <sup>WT</sup>*KRAS* by standard method. Therefore, the percentage of patients developing <sup>MUT</sup>*KRAS* as a mechanism of acquired resistance is 42% (14 patients). In terms of TTP and OS, there was no

difference between these patients and the others ( $p = 0.19$  and  $p = 0.13$ , respectively).

The concordance between tissue of re-biopsies (standard methods) and plasma (ddPCR), calculated by combining positive and negative results, was 62.5% and 37.5% for <sup>p.T790M</sup>*EGFR* and <sup>MUT</sup>*KRAS*, respectively (Table 3). Moreover, three paired samples found positive for the <sup>p.T790M</sup>*EGFR* on re-biopsies (standard methods) and on cftDNA (ddPCR), were negative by ddPCR on primary tissue (Table 3).

The analysis of survival data stratified according to *KRAS* status in cftDNA, showed that TTP and OS were not statistically different, despite a trend towards a better survival in <sup>WT</sup>*KRAS* vs. <sup>MUT</sup>*KRAS* patients, i.e., TTP 14.4 vs. 11.4 months ( $p = 0.97$ ) and OS 40.2 vs. 35.0 months ( $p = 0.56$ ), respectively.

Finally, samples were analysed also for codons 13 (p.G13D) and 61 <sup>MUT</sup>*KRAS* and <sup>MUT</sup>*NRAS*, and <sup>V600E</sup>*BRAF* and all the samples were found to be wild-type. Unfortunately, due to sample restriction, cftDNA was insufficient to perform the analysis of PI3K/Akt mutations.

**Table 2: Types of activating mutations of <sup>MUT</sup>EGFR in primary tumor and % of <sup>p.T790M</sup>EGFR and <sup>MUT</sup>KRAS alleles in cftDNA. “-“ Indicates wild-type allele**

| Sample | Activating <sup>MUT</sup> EGFR | <sup>p.T790M</sup> EGFR % | <sup>MUT</sup> KRAS % |
|--------|--------------------------------|---------------------------|-----------------------|
| 1      | Ex19del                        | 7%                        | 2%                    |
| 2      | p.L858R                        | 11%                       | -                     |
| 3      | Ex19del                        | 1%                        | 1%                    |
| 4      | Ex19del                        | 3%                        | 2%                    |
| 5      | Ex19del                        | -                         | 1%                    |
| 6      | Ex19del                        | -                         | 1.5%                  |
| 7      | Ex19del                        | 1.5%                      | 1%                    |
| 8      | p.L858R                        | 1%                        | -                     |
| 9      | Ex19del                        | -                         | -                     |
| 10     | Ex19del                        | -                         | -                     |
| 11     | p.L858R                        | -                         | -                     |
| 12     | p.L858R                        | 5%                        | -                     |
| 13     | Ex19del                        | -                         | -                     |
| 14     | p.L747P                        | 2%                        | -                     |
| 15     | p.L858R                        | -                         | -                     |
| 16     | Ex19del                        | 1%                        | -                     |
| 17     | Ex19del                        | 1%                        | 2%                    |
| 18     | Ex19del                        | 16%                       | 1%                    |
| 19     | p.L858R                        | 23%                       | 1%                    |
| 20     | Ex19del                        | 96%                       | 98%                   |
| 21     | Ex19del                        | -                         | -                     |
| 22     | Ex19ins                        | -                         | 1%                    |
| 23     | Ex19del                        | 33%                       | 2%                    |
| 24     | p.L747P                        | 1%                        | 1%                    |
| 25     | p.L858R                        | 5%                        | 2%                    |
| 26     | p.L858R                        | 3%                        | 1%                    |
| 27     | Ex19del                        | 9%                        | 3%                    |
| 28     | p.L858R                        | 14%                       | -                     |
| 29     | Ex19del                        | 28%                       | -                     |
| 30     | p.L858R                        | 7%                        | -                     |
| 31     | Ex19del                        | 39%                       | -                     |
| 32     | Ex19del                        | 6%                        | -                     |
| 33     | Ex19del                        | 43%                       | -                     |

## DISCUSSION

The present study demonstrates the presence of <sup>MUT</sup>KRAS in the cftDNA of a significant proportion of patients progressing after EGFR-TKI treatment. In addition to this, the present study provides evidence that sensitizing <sup>MUT</sup>EGFR and <sup>MUT</sup>KRAS can coexist after the selective pressure of EGFR-TKI treatment.

<sup>p.T790M</sup>EGFR determines acquired resistance by increasing the affinity of EGFR to ATP [16, 17]. <sup>p.T790M</sup>EGFR has been described in re-biopsies of 50–63%

of tumors progressing under EGFR-TKI treatment [4, 11] and in the cftDNA at a frequency similar to our study [18–0]. Because drugs active on <sup>p.T790M</sup>EGFR, such as AZD9291 and rociletinib [21, 22], are under clinical study and will be available soon in the clinical practice, the identification of this molecular marker is of utmost clinical relevance.

In our study, <sup>p.T790M</sup>EGFR was more frequent in <sup>L858R</sup>EGFR patients than in <sup>ex19del</sup>EGFR ones (80% vs. 67%); on the contrary, <sup>MUT</sup>KRAS in cftDNA was detected in 55% of patients with <sup>ex19del</sup>EGFR vs. 30% of patients with

<sup>L858R</sup>EGFR. To our knowledge, a mechanism of resistance depending on activating <sup>MUT</sup>EGFR has not been previously reported; however, this cohort is too small to draw any conclusion.

<sup>MUT</sup>EGFR and <sup>MUT</sup>KRAS are mutually exclusive in primary NSCLC and only anecdotal case reports described their coexistence [23, 24]. <sup>MUT</sup>KRAS occurs in approximately 20% of NSCLC cases at diagnosis, more frequently in Caucasian population, adenocarcinomas, males and current smokers [25, 26]. About 90% of KRAS mutations occur in exon 2 (codon 12 and 13), while exon 3 (codon 61) is less frequently involved [26, 27]; in never-smokers with lung adenocarcinoma, <sup>MUT</sup>KRAS is more frequently a transition (G to A) compared to transversion in current smokers [25]. Colo-rectal cancer cells with <sup>MUT</sup>KRAS treated with anti-EGFR monoclonal antibodies are able to escape growth inhibition by several mechanisms, including <sup>MUT</sup>RAS [28]. While the role of <sup>MUT</sup>KRAS in primary resistance to EGFR-TKIs in molecularly unselected NSCLC is quite well established [29, 30], its development and role in acquired resistance to EGFR-TKIs in <sup>MUT</sup>EGFR patients has not been explored in detail. In a previous work on a large collection of NSCLC tissues from patients with acquired EGFR-TKI resistance, <sup>MUT</sup>NRAS or <sup>MUT</sup>KRAS were not demonstrated [10]. However, comparison with the present results is not possible because detailed information were not provided neither on the timing of sampling with respect of development of TKI resistance nor on the type of tissue analysed. Therefore, we addressed this issue and a sensitive ddPCR-based platform was employed to investigate the presence of <sup>MUT</sup>KRAS alleles besides the well-known <sup>p.T790M</sup>EGFR. Due to its high sensitivity,

ddPCR is able to identify small amounts of <sup>MUT</sup>KRAS and many methodological issues need to be addressed prospectively, particularly the threshold level of both <sup>MUT</sup>KRAS and <sup>p.T790M</sup>EGFR to be considered clinically relevant. However, a mechanism of drug resistance does not necessarily reflect biologic aggressiveness and the lack of difference in OS between KRAS wild-type and mutated patients it is therefore not surprising. The numeric dimension of the cell clone bearing <sup>MUT</sup>KRAS should be taken into consideration as well. Nevertheless, despite the low proportion of smokers in our cohort, the high prevalence of <sup>MUT</sup>KRAS could support its role of as mechanism of acquired resistance.

Eight patients underwent re-biopsy after tumor progression during EGFR-TKI, allowing a comparison between tissue and cftDNA. The detection of mutations in cftDNA but not in re-biopsy, using both standard methods and ddPCR, could suggest the presence of heterogeneity within metastatic sites or the lower performance of ddPCR in the presence of paraffin. Nevertheless, the detection of mutations in both plasma and tissue by ddPCR, but not by standard methods, could be due to the higher sensitivity of ddPCR analysis. Two patients, initially diagnosed <sup>WT</sup>KRAS by standard method, were re-analysed by ddPCR and were found <sup>MUT</sup>KRAS in the primary biopsy, suggesting that the <sup>MUT</sup>KRAS clone co-existed with activating <sup>MUT</sup>EGFR since the beginning, as also demonstrated in previous reports [23, 24]. In these patients, <sup>MUT</sup>KRAS cannot strictly be considered a mechanisms of resistance but it could be possible that EGFR-TKI treatment may have favored the expansion of <sup>MUT</sup>KRAS-positive clones. However, conclusions cannot be drawn as pre-treatment cftDNA was not available.

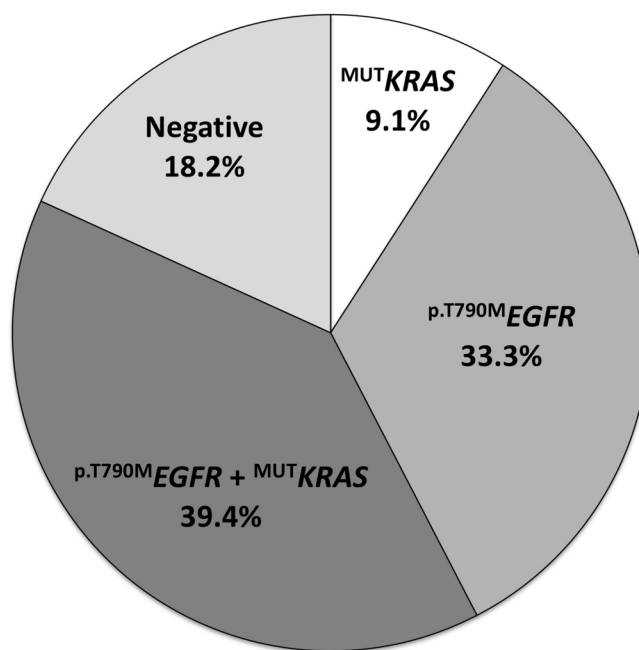

**Figure 1: Occurrence of KRAS and p.T790M mutations in cftDNA of NSCLC patients treated with EGFR-TKI**

**Table 3: Molecular analysis of re-biopsies and comparison with cftDNA**

| Patient n. | Primary tumor  |                  |                          | Re-biopsy        |                        |                | cftDNA                   |                  |
|------------|----------------|------------------|--------------------------|------------------|------------------------|----------------|--------------------------|------------------|
|            | MUTKRAS<br>std | MUTKRAS<br>ddPCR | p.T790M<br>EGFR<br>ddPCR | MUTKRAS<br>ddPCR | p.T790M<br>EGFR<br>std | MUTKRAS<br>std | p.T790M<br>EGFR<br>ddPCR | MUTKRAS<br>ddPCR |
| 2          | -              | NA               | -                        | -                | -                      | -              | Mut                      | -                |
| 4          | -              | Mut              | Mut                      | Mut              | -                      | -              | Mut                      | Mut              |
| 5          | -              | Mut              | -                        | Mut              | -                      | -              | -                        | Mut              |
| 19         | -              | -                | -                        | -                | Mut                    | -              | Mut                      | Mut              |
| 20         | -              | -                | -                        | -                | -                      | -              | Mut                      | Mut              |
| 23         | -              | -                | Mut                      | Mut              | Mut                    | -              | Mut                      | Mut              |
| 28         | -              | NA               | -                        | -                | Mut                    | -              | Mut                      | -                |
| 30         | -              | NA               | -                        | -                | Mut                    | -              | Mut                      | -                |

Mut: presence; “-”: absence of mutation; NA: sample not available; std: standard sequencing approach.

Our observation is a pivotal evidence of the presence of MUTKRAS in cftDNA of tumors with sensitizing MUTEGFR resistant to EGFR-TKIs. A small percentage of our patients received EGFR-TKI as third line therapy and a new biopsy was not repeated at this time. It could be possible that MUTKRAS appeared before the initiation of TKI as a mechanism of resistance to previous therapy. This hypothesis is weakened by the evidence that patients given second or further lines of therapy showed TTP and OS similar to patients treated in first line, although a mechanism of resistance does not necessarily affect survival. The presence of MUTKRAS has been recently reported using next generation sequencing analysis of tumor re-biopsies after progression under EGFR-TKI treatment [31], similarly to colo-rectal cancer treated with EGFR antibodies [32, 33]. It remains to be determined if the presence of p.T790M EGFR and MUTKRAS coexist in the same tumor cell or arise in different subclones.

Targeting MUTKRAS proteins is still a challenge [34, 35]. Theoretically, combined treatment with KRAS and EGFR inhibitors can be administered to patients to prevent MUTKRAS-dependent resistance or restore sensitivity to EGFR-TKIs, as recently demonstrated co-targeting EGFR and MEK [36]. To date, p.T790M EGFR remains the most important predictor of efficacy of third generation EGFR-TKIs. Moreover, it was found that the coexistence of both activating MUTEGFR and MUTKRAS was not necessarily a negative predictor for EGFR-TKI therapy [23]. With these evidences in mind, all patients with p.T790M EGFR should receive third generation EGFR-TKI, even in the presence of MUTKRAS. Theoretically, it is possible that MUTKRAS identify a less responsive subgroup of patients but this hypothesis should be validated by monitoring patients prospectively during second-line therapy. Beside p.T790M EGFR and MUTKRAS, other mechanisms of acquired resistance not evaluated in our study have been described in tumor re-biopsies after EGFR-TKI progression, including actionable mutations

of MET [7], HER2 [8], PIK3CA [9] or transformation into small cell histology (3%) [11].

In conclusion, despite the small number of patients involved, the retrospective analysis and the low rate of re-biopsies, our results confirm the importance of cftDNA analysis for the monitoring of secondary mutations associated with EGFR-TKI resistance in NSCLC and underline the role of a highly sensitive approach, i.e., ddPCR, for the detection of low-level mutations. The clinical relevance of these findings, especially for what concerns MUTKRAS, needs to be evaluated prospectively. These observations open new perspectives in the molecular mechanisms of acquired resistance, indicating a possible role of MUTKRAS in tumor escape from pharmacologic treatment. The effect of MUTKRAS in NSCLC with activating MUTEGFR needs to be further elucidated at the molecular level and encourages the development of inhibitors MUTKRAS for optimal treatment of patients.

## MATERIALS AND METHODS

### Study population

A total of 33 NSCLC patients with activating MUTEGFR (exon 19 deletion [ex19del EGFR], exon 21 c.2573T > G [p.L858R EGFR] or exon 19 c.2240T > C [p.L747P EGFR]), receiving EGFR-TKI (gefitinib or erlotinib) as per approved indication were included in this study. The analysis of EGFR mutations in primary tumors was performed by standard diagnostic procedures in use in each centre participating to this study (i.e., EGFR TKI response®, Diatech, Jesi, Italy; Therascreen®, Qiagen, Valencia, CA, USA). MUTKRAS were not examined at the time of diagnosis because mutually exclusive with activating MUTEGFR. Plasma and/or re-biopsy samples were taken at the time of disease progression. The analysis of MUTKRAS mutations and EGFR c.2369C > T (p.T790M EGFR) in plasma was not part of standard clinical management and the study was

submitted and approved by the Ethics Committee of Pisa University Hospital and conducted in accordance to the principles of the Declaration of Helsinki; all patients gave their signed informed consent before blood collection and cftDNA analysis.

### Plasma collection and cftDNA extraction

Six ml of blood were collected in EDTA and centrifuged at 4°C for 10 min at 3000 rpm within two hours after blood drawing. Plasma samples were stored at -80°C until analysis. cftDNA was extracted using a QIAmp Circulating nucleic acid Kit (Qiagen®, Valencia, CA, USA) from 1 to 3 ml of plasma following the manufacturer's protocol and the DNA was eluted in 100 µl of buffer.

### Analysis of cftDNA

The investigational part of this study included the assessment of codons 12, 13 (p.G13D) and 61<sup>MUT</sup>*KRAS* and<sup>MUT</sup>*NRAS*, p.T790M<sup>EGFR</sup>, V600E<sup>BRAF</sup> in cftDNA. Other mutations potentially associated with EGFR-TKI resistance were not examined because of the limited amount of cftDNA available. The analysis of cftDNA was performed by digital droplet PCR (ddPCR, BioRad®, Hercules, CA, USA) and ddPCR Mutation Assay (BioRad®). The analytic procedure was unable to discriminate the nature of the<sup>MUT</sup>*KRAS* because the analysis was performed with a ddPCR *KRAS* Multiplex assay.

PCR reactions were assembled into individual wells of a single-use injection molded cartridge, according to the following protocol: 20 ng of template DNA (4 µl), 1 µl of 20X target primer/probe assay (FAM), 1 µl of 20X wild type primer/probe assay (HEX), 10 µl of 2X ddPCR Super Mix and 4 µl of DNase/RNase-free water up to a total volume of 20 µl. Droplet generation oil (70 µl) was then loaded and the cartridge was placed into the droplet generator. Using vacuum, sample and oil were mixed, generating mono-disperse droplets. Thereafter, 40 µl of packed droplets were transferred into a 96-well PCR plate for thermal cycling amplification. The protocol was standardized for all mutations to the following conditions: 95°C × 10 min, 94°C × 30 s and 55°C × 60 s (35 cycles), 98°C × 10 min, and 4°C hold. The droplet reader (BioRad®) was used for fluorescence signal quantification. The concordance between<sup>MUT</sup>*KRAS* and p.T790M<sup>EGFR</sup> was assessed on pairwise cftDNA and tissue DNA of 8 patients who underwent re-biopsy for diagnostic purposes. DNA was extracted from formalin-fixed paraffin-embedded biopsies using the QIAmp DNA Mini Kit (Qiagen®) and analyzed using conventional diagnostics as reported above. As a positive control for<sup>MUT</sup>*KRAS*, the cftDNA from 30 patients with known<sup>MUT</sup>*KRAS* pancreatic cancer was used, while the DNA extracted from plasma of 43 healthy blood donors was employed as negative control for<sup>MUT</sup>*KRAS* and p.T790M<sup>EGFR</sup>.

### Data analysis

TTP and OS were calculated following standard procedures and survival curves were generated by the SPSS statistical software (version 16).

### Financial support

This study was supported in part by grants from the Italian Association for Cancer Research (AIRC, Italy), MIUR and ITT (Italy) and Fondazione Berlucci (2014) to RD; AIRC (grant #12182), Camp-Pac FP7 (grant #602783) and FIMP-Ministero Salute (CUP\_J33G13000210001) to AS.

### REFERENCES

1. Mok TS, Wu YL, Thongprasert S, Yang CH, Chu DT, Saijo N, Sunpaweravong P, Han B, Margono B, Ichinose Y, Nishiwaki Y, Ohe Y, Yang JJ, et al. Gefitinib or carboplatin-paclitaxel in pulmonary adenocarcinoma. *N Engl J Med*. 2009; 361:947–957.
2. Rosell R, Carcereny E, Gervais R, Vergnenegre A, Massuti B, Felip E, Palmero R, Garcia-Gomez R, Pallares C, Sanchez JM, Porta R, Cobo M, Garrido P, et al. Erlotinib versus standard chemotherapy as first-line treatment for European patients with advanced EGFR mutation-positive non-small-cell lung cancer (EURTAC): a multicentre, open-label, randomised phase 3 trial. *Lancet Oncol*. 2012; 13:239–246.
3. Sequist LV, Yang JC, Yamamoto N, O'Byrne K, Hirsh V, Mok T, Geater SL, Orlov S, Tsai CM, Boyer M, Su WC, Bennouna J, Kato T, et al. Phase III study of afatinib or cisplatin plus pemetrexed in patients with metastatic lung adenocarcinoma with EGFR mutations. *J Clin Oncol*. 2013; 31:3327–3334.
4. Sequist LV, Waltman BA, Dias-Santagata D, Digumarthy S, Turke AB, Fidias P, Bergethon K, Shaw AT, Gettinger S, Cospir AK, Akhavanfard S, Heist RS, Temel J, et al. Genotypic and histological evolution of lung cancers acquiring resistance to EGFR inhibitors. *Sci Transl Med*. 2011; 3:75ra26.
5. Gainor JF, Shaw AT. Emerging paradigms in the development of resistance to tyrosine kinase inhibitors in lung cancer. *J Clin Oncol*. 2013; 31:3987–3996.
6. Shih JY, Gow CH, Yang PC. EGFR mutation conferring primary resistance to gefitinib in non-small-cell lung cancer. *N Engl J Med*. 2005; 353:207–208.
7. Bean J, Brennan C, Shih JY, Riely G, Viale A, Wang L, Chitale D, Motoi N, Szoke J, Broderick S, Balak M, Chang WC, Yu CJ, et al. MET amplification occurs with or without T790M mutations in EGFR mutant lung tumors with acquired resistance to gefitinib or erlotinib. *Proc Natl Acad Sci U S A*. 2007; 104:20932–20937.
8. Takezawa K, Pirazzoli V, Arcila ME, Nebhan CA, Song X, de Stanchina E, Ohashi K, Janjigian YY, Spitzler PJ, Melnick MA, Riely GJ, Kris MG, Miller VA, et al. HER2

- amplification: a potential mechanism of acquired resistance to EGFR inhibition in EGFR-mutant lung cancers that lack the second-site EGFR T790M mutation. *Cancer Discov.* 2012; 2:922–933.
9. Ludovini V, Bianconi F, Pistola L, Chiari R, Minotti V, Colella R, Giuffrida D, Tofanetti FR, Siggillino A, Flacco A, Baldelli E, Iacono D, Mameli MG, et al. Phosphoinositide-3-kinase catalytic alpha and KRAS mutations are important predictors of resistance to therapy with epidermal growth factor receptor tyrosine kinase inhibitors in patients with advanced non-small cell lung cancer. *J Thorac Oncol.* 2011; 6:707–715.
  10. Ohashi K, Sequist LV, Arcila ME, Moran T, Chmielecki J, Lin YL, Pan Y, Wang L, de Stanchina E, Shien K, Aoe K, Toyooka S, Kiura K, et al. Lung cancers with acquired resistance to EGFR inhibitors occasionally harbor BRAF gene mutations but lack mutations in KRAS, NRAS, or MEK1. *Proc Natl Acad Sci U S A.* 2012; 109:E2127–2133.
  11. Yu HA, Arcila ME, Rekhtman N, Sima CS, Zakowski MF, Pao W, Kris MG, Miller VA, Ladanyi M, Riely GJ. Analysis of tumor specimens at the time of acquired resistance to EGFR-TKI therapy in 155 patients with EGFR-mutant lung cancers. *Clin Cancer Res.* 2013; 19:2240–2247.
  12. Ding L, Getz G, Wheeler DA, Mardis ER, McLellan MD, Cibulskis K, Sougnez C, Greulich H, Muzny DM, Morgan MB, Fulton L, Fulton RS, Zhang Q, et al. Somatic mutations affect key pathways in lung adenocarcinoma. *Nature.* 2008; 455:1069–1075.
  13. Bosc C, Ferretti GR, Cadranel J, Audigier-Valette C, Besse B, Barlesi F, Decroisette C, Lantuejoul S, Arbib F, Moro-Sibilot D. Rebiopsy during disease progression in patients treated by TKI for oncogene-addicted NSCLC. *Target Oncol.* 2015; 10:247–253.
  14. Del Re M, Vasile E, Falcone A, Danesi R, Petrini I. Molecular analysis of cell-free circulating DNA for the diagnosis of somatic mutations associated with resistance to tyrosine kinase inhibitors in non-small-cell lung cancer. *Expert Rev Mol Diagn.* 2014; 14:453–468.
  15. Riely GJ, Ladanyi M. KRAS mutations: an old oncogene becomes a new predictive biomarker. *J Mol Diagn.* 2008; 10:493–495.
  16. Godin-Heymann N, Bryant I, Rivera MN, Ulkus L, Bell DW, Riese DJ, 2nd, Settleman J, Haber DA. Oncogenic activity of epidermal growth factor receptor kinase mutant alleles is enhanced by the T790M drug resistance mutation. *Cancer Res.* 2007; 67:7319–7326.
  17. Yun CH, Mengwasser KE, Toms AV, Woo MS, Greulich H, Wong KK, Meyerson M, Eck MJ. The T790M mutation in EGFR kinase causes drug resistance by increasing the affinity for ATP. *Proc Natl Acad Sci U S A.* 2008; 105:2070–2075.
  18. Oxnard GR, Paweletz CP, Kuang Y, Mach SL, O'Connell A, Messineo MM, Luke JJ, Butaney M, Kirschmeier P, Jackman DM, Janne PA. Noninvasive detection of response and resistance in EGFR-mutant lung cancer using quantitative next-generation genotyping of cell-free plasma DNA. *Clin Cancer Res.* 2014; 20:1698–1705.
  19. Sorensen BS, Wu L, Wei W, Tsai J, Weber B, Nexø E, Meldgaard P. Monitoring of epidermal growth factor receptor tyrosine kinase inhibitor-sensitizing and resistance mutations in the plasma DNA of patients with advanced non-small cell lung cancer during treatment with erlotinib. *Cancer.* 2014; 120:3896–3901.
  20. Taniguchi K, Uchida J, Nishino K, Kumagai T, Okuyama T, Okami J, Higashiyama M, Kodama K, Imamura F, Kato K. Quantitative detection of EGFR mutations in circulating tumor DNA derived from lung adenocarcinomas. *Clin Cancer Res.* 2011; 17:7808–7815.
  21. Janne PA, Yang JC, Kim DW, Planchard D, Ohe Y, Ramalingam SS, Ahn MJ, Kim SW, Su WC, Horn L, Haggstrom D, Felip E, Kim JH, et al. AZD9291 in EGFR inhibitor-resistant non-small-cell lung cancer. *N Engl J Med.* 2015; 372:1689–1699.
  22. Sequist LV, Soria JC, Goldman JW, Wakelee HA, Gadgeel SM, Varga A, Papadimitrakopoulou V, Solomon BJ, Oxnard GR, Dziadziuszko R, Aisner DL, Doebele RC, Galasso C, et al. Rociletinib in EGFR-mutated non-small-cell lung cancer. *N Engl J Med.* 2015; 372:1700–1709.
  23. Benesova L, Minarik M, Jancarikova D, Belsanova B, Pesek M. Multiplicity of EGFR and KRAS mutations in non-small cell lung cancer (NSCLC) patients treated with tyrosine kinase inhibitors. *Anticancer Res.* 2010; 30:1667–1671.
  24. Choughule A, Sharma R, Trivedi V, Thavamani A, Noronha V, Joshi A, Desai S, Chandrani P, Sundaram P, Utture S, Jambhekar N, Gupta S, Aich J, et al. Coexistence of KRAS mutation with mutant but not wild-type EGFR predicts response to tyrosine-kinase inhibitors in human lung cancer. *Br J Cancer.* 2014; 111:2203–2204.
  25. Riely GJ, Kris MG, Rosenbaum D, Marks J, Li A, Chitale DA, Nafa K, Riedel ER, Hsu M, Pao W, Miller VA, Ladanyi M. Frequency and distinctive spectrum of KRAS mutations in never smokers with lung adenocarcinoma. *Clin Cancer Res.* 2008; 14:5731–5734.
  26. Martin P, Leigh NB, Tsao MS, Shepherd FA. KRAS mutations as prognostic and predictive markers in non-small cell lung cancer. *J Thorac Oncol.* 2013; 8:530–542.
  27. Vakiani E, Solit DB. KRAS, BRAF: drug targets and predictive biomarkers. *J Pathol.* 2011; 223:219–229.
  28. Kasper S, Breitenbuecher F, Reis H, Brandau S, Worm K, Kohler J, Paul A, Trarbach T, Schmid KW, Schuler M. Oncogenic RAS simultaneously protects against anti-EGFR antibody-dependent cellular cytotoxicity and EGFR signaling blockade. *Oncogene.* 2013; 32:2873–2881.
  29. Mao C, Qiu LX, Liao RY, Du FB, Ding H, Yang WC, Li J, Chen Q. KRAS mutations and resistance to EGFR-TKIs treatment in patients with non-small cell lung cancer: a meta-analysis of 22 studies. *Lung Cancer.* 2010; 69:272–278.
  30. Massarelli E, Varella-Garcia M, Tang X, Xavier AC, Ozburn NC, Liu DD, Bekele BN, Herbst RS, Wistuba, II.



- KRAS mutation is an important predictor of resistance to therapy with epidermal growth factor receptor tyrosine kinase inhibitors in non-small-cell lung cancer. *Clin Cancer Res.* 2007; 13:2890–2896.
31. Bivona T, Giannikopoulos P, Costa C. Integrated genomic analysis by whole exome and transcriptome sequencing of tumor samples from EGFR-mutant non-small-cell lung cancer (NSCLC) patients with acquired resistance to erlotinib. *J Thorac Oncol.* 2013; 8:MO21.05.
  32. Diaz LA, Jr, Williams RT, Wu J, Kinde I, Hecht JR, Berlin J, Allen B, Bozic I, Reiter JG, Nowak MA, Kinzler KW, Oliner KS, et al. The molecular evolution of acquired resistance to targeted EGFR blockade in colorectal cancers. *Nature.* 2012; 486:537–540.
  33. Misale S, Yaeger R, Hobor S, Scala E, Janakiraman M, Liska D, Valtorta E, Schiavo R, Buscarino M, Siravegna G, Bencardino K, Cercek A, Chen CT, et al. Emergence of KRAS mutations and acquired resistance to anti-EGFR therapy in colorectal cancer. *Nature.* 2012; 486:532–536.
  34. Baker NM, Der CJ. Cancer: Drug for an ‘undruggable’ protein. *Nature.* 2013; 497:577–578.
  35. Cox AD, Fesik SW, Kimmelman AC, Luo J, Der CJ. Drugging the undruggable RAS: Mission possible? *Nat Rev Drug Discov.* 2014; 13:828–851.
  36. Tricker EM, Xu C, Uddin S, Capelletti M, Ercan D, Ogino A, Pratilas CA, Rosen N, Gray NS, Wong KK, Janne PA. Combined EGFR/MEK Inhibition Prevents the Emergence of Resistance in EGFR-Mutant Lung Cancer. *Cancer Discov.* 2015; 5:960–971.
